# Supplementary material
Source: PubMed Central journal article supplement (PMC4446148)
Supplement: NIHMS686015-supplement.pdf [file NIHMS686015-supplement.pdf]

# Dendritic Nanoconjugates of Photosensitizer for Targeted Photodynamic Therapy

Ahu Yuan<sup>a,b</sup>, Bing Yang<sup>a</sup>, Jinhui Wu<sup>b</sup>, Yiqiao Hu<sup>b</sup>, Xin Ming<sup>a,\*</sup>

## Affiliations:

<sup>a</sup> Division of Molecular Pharmaceutics, UNC Eshelman School of Pharmacy,  
University of North Carolina, Chapel Hill, NC 27599, USA.

<sup>b</sup> State Key Laboratory of Pharmaceutical Biotechnology, Nanjing University,  
Nanjing 210093, China

\* Corresponding author.

Xin Ming, Ph.D.

Division of Molecular Pharmaceutics, UNC Eshelman School of Pharmacy,  
1073 Genetic Medicine Building, University of North Carolina, Chapel Hill, NC  
27599, USA.

Tel.: +1 919 966 4343.

E-mail: [xming@email.unc.edu](mailto:xming@email.unc.edu)

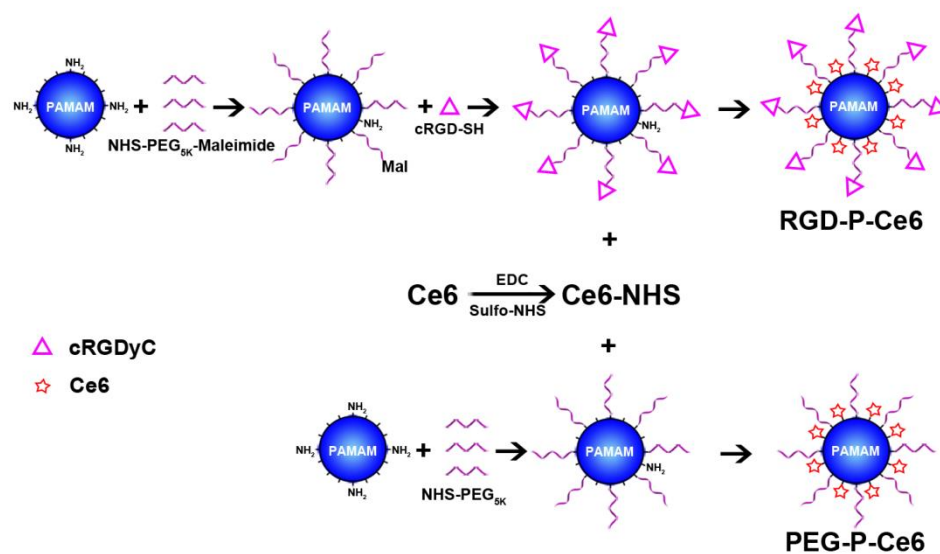

Sfigure 1: The reaction scheme of RGD-P-Ce6 and PEG-P-Ce6.

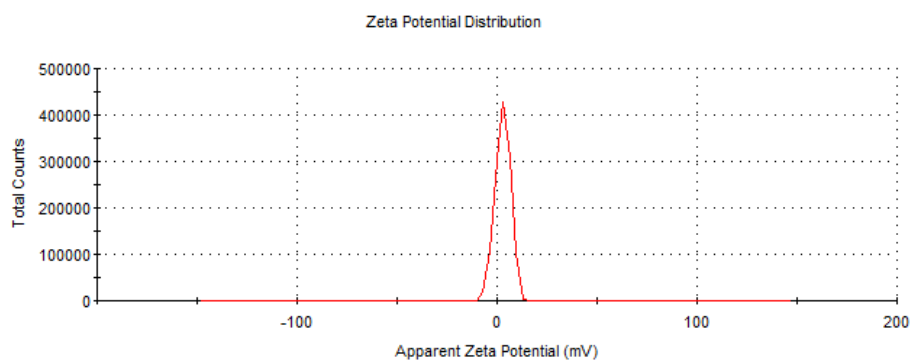

Figure 2: Zeta potential of non-targeted nanoconjugates PEG-P-Ce6 with +2.9mV.

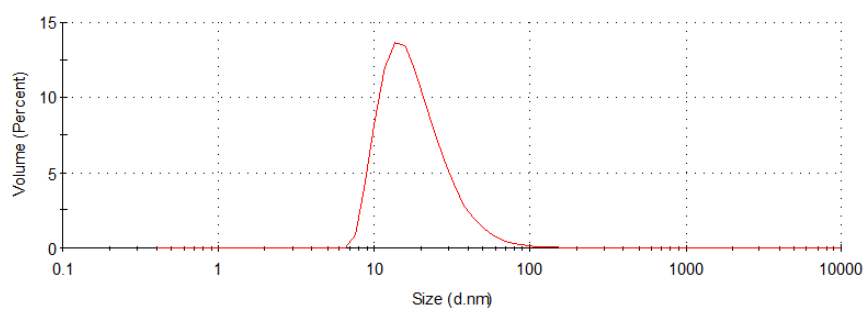

Sfigure 3: Particle size distribution of non-targeted nanoconjugates PEG-P-Ce6 with mean diameter of 20nm.

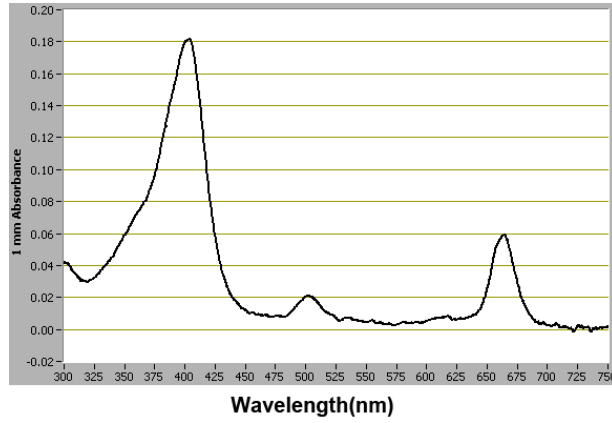

Sfigure 4: UV/vis absorption spectrum of RGD-P-Ce6 (20 $\mu$ M).

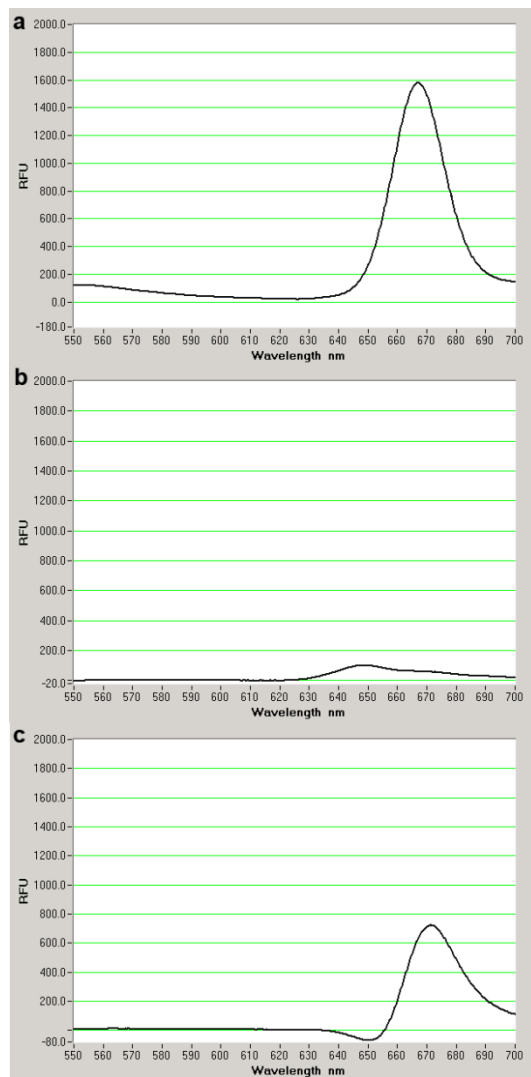

Sfigure 5: Fluorescent spectrum of free Ce6 dissolved in methanol (a) and PBS (b), RGD-P-Ce6 diluted in PBS(c). The concentration was 20 $\mu$ M.

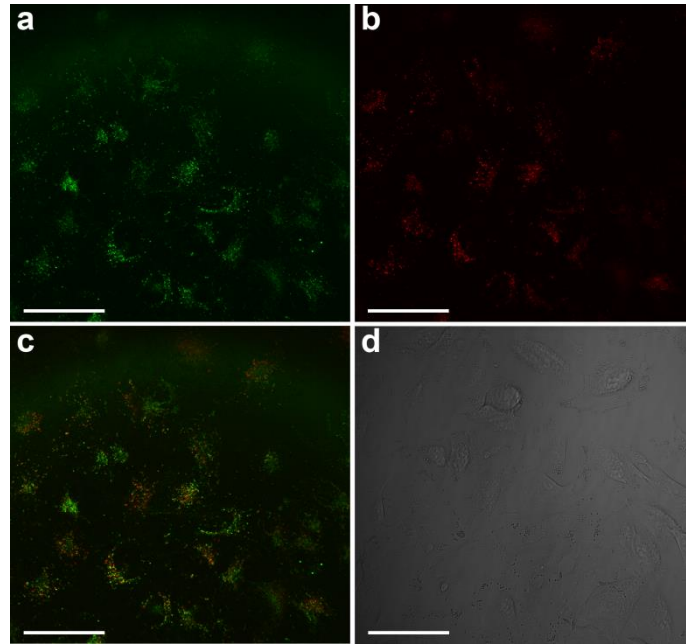

Figure 6: Confocal fluorescence microscopy of A375 cells after treatment with RGD-P-Ce6. (a) early endosomes labelled by Transferrin-Alexa 488, (b) RGD-P-Ce6, (c) merged and (d) DIC. Scale bar, 50 $\mu$ m.

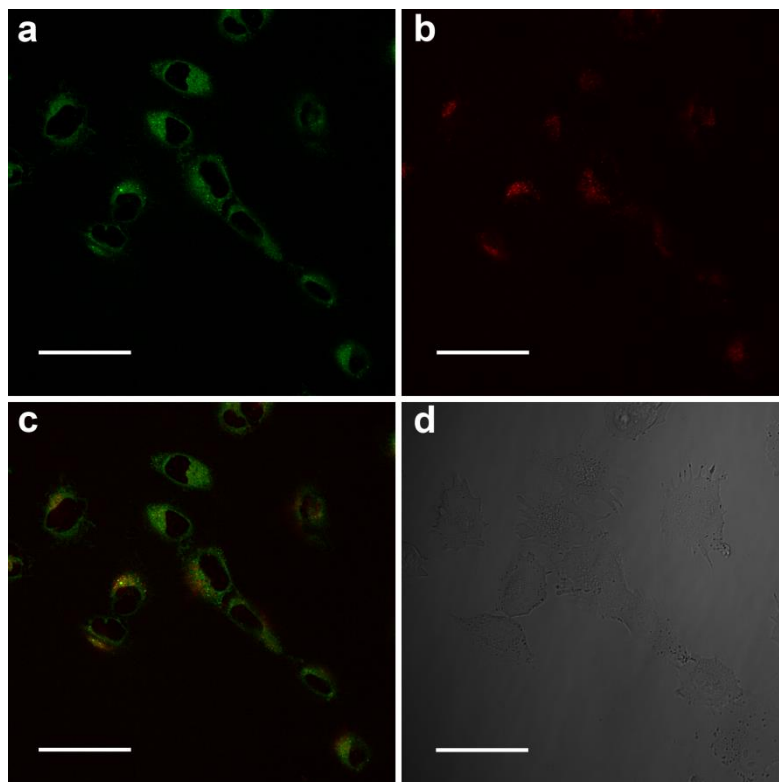

Figure 7: Confocal fluorescence microscopy of A375 cells after treatment with RGD-P-Ce6. (a) ER labelled by ER Tracker Green, (b) RGD-P-Ce6, (c) merged and (d) DIC. Scale bar, 50 $\mu$ m.

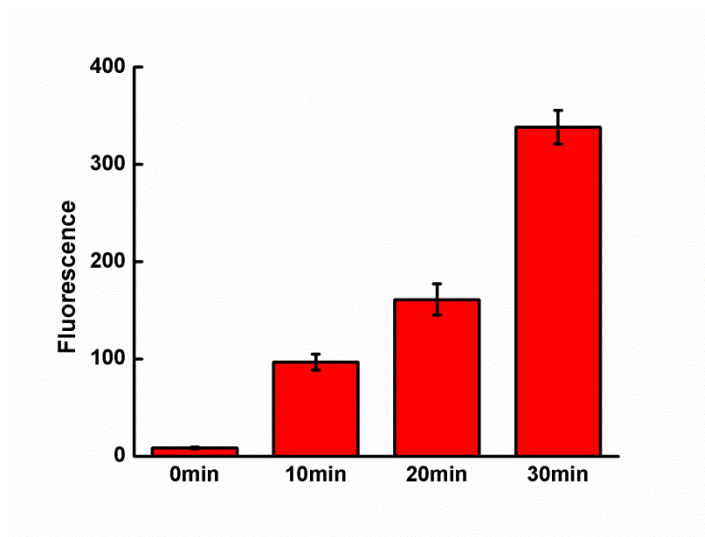

Sfigure 8: Mean fluorescence of ROS probe-CM-H<sub>2</sub>DCFDA using FITC channel upon photo-irradiation for 0, 10, 20 and 30min, respectively.

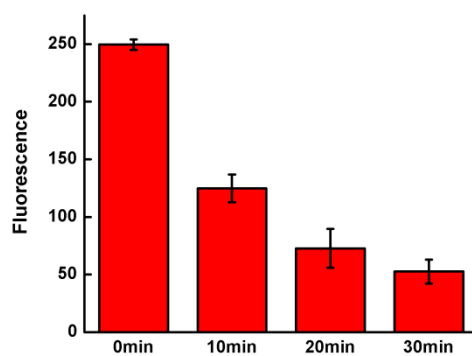

Sfigure 9: The remaining RGD-P-Ce6 in cells upon photo-irradiation for 0, 10, 20 and 30min, respectively.

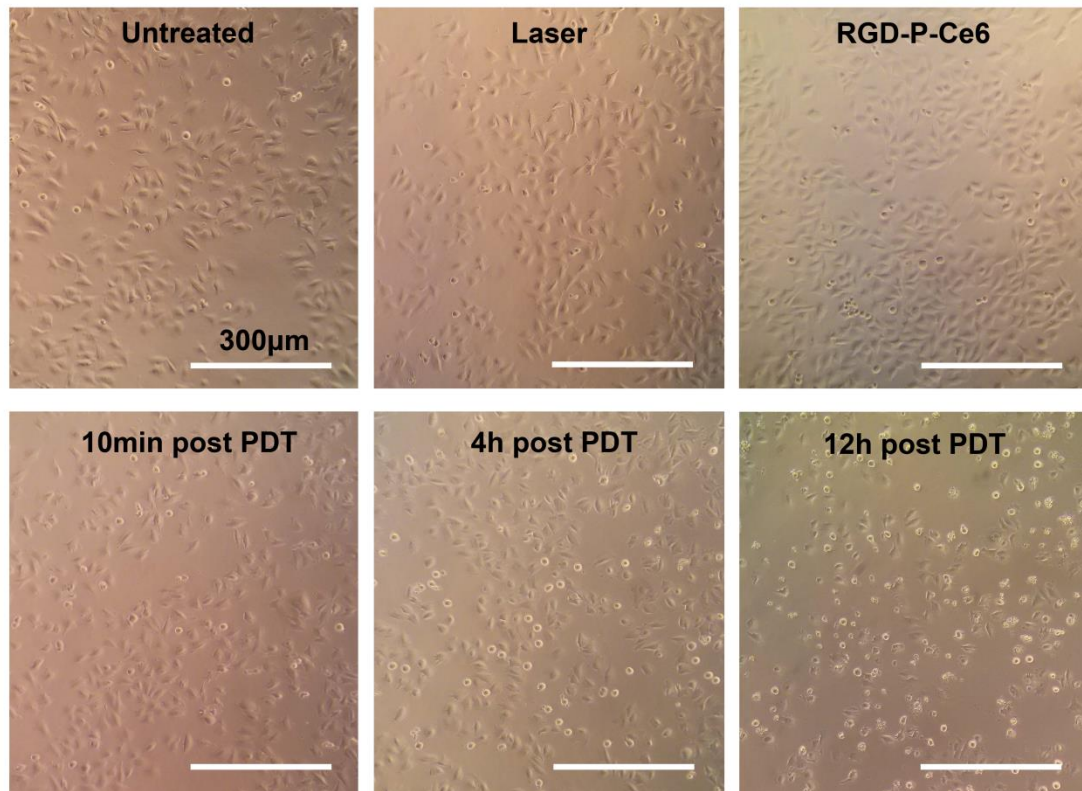

Sfigure 10: Microscopic images of A375 cells apoptosis induced by RGD-P-Ce6 mediated PDT. Scale bar, 300µm.

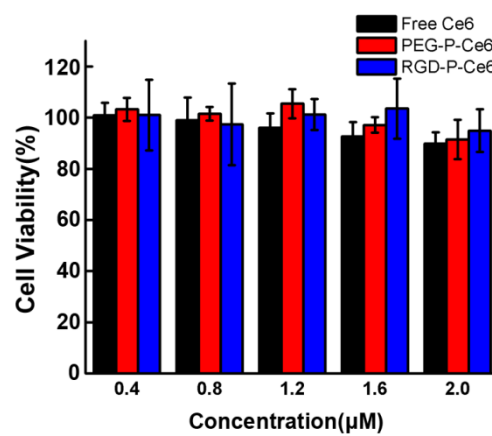

Sfigure 11: Dark toxicity of free Ce6, PEG-P-Ce6 and RGD-P-Ce6 in A375 cells.

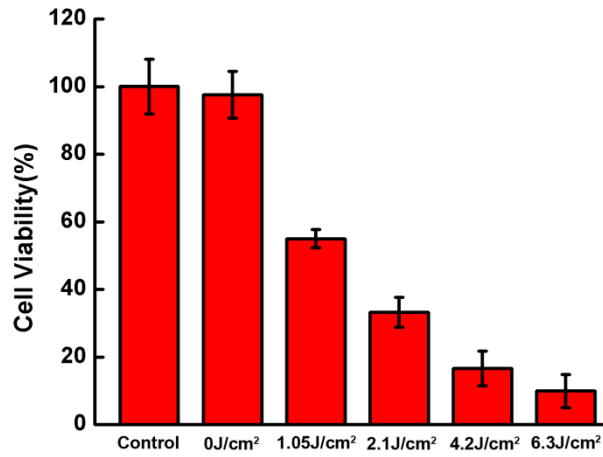

Sfigure 12: Effect of the dose of the light exposure on the cell viability of RGD-P-Ce6 (100nM) mediated PDT in A375 cells. Non-treated cells were set as control. Data are presented as the mean  $\pm$  SD (n=3).

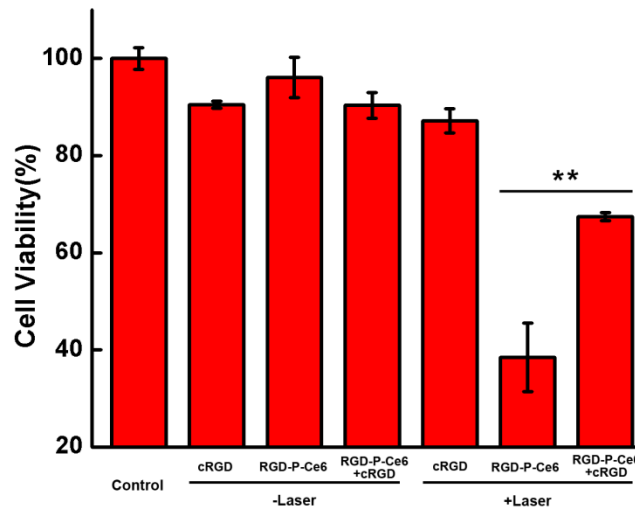

Sfigure 13: Effect of free cRGD on the cell viability of RGD-P-Ce6 (50nM) mediated PDT in A375 cells. Non-treated cells were set as control. Data are presented as the mean  $\pm$  SD (n=3), \*\* $p$ <0.01.

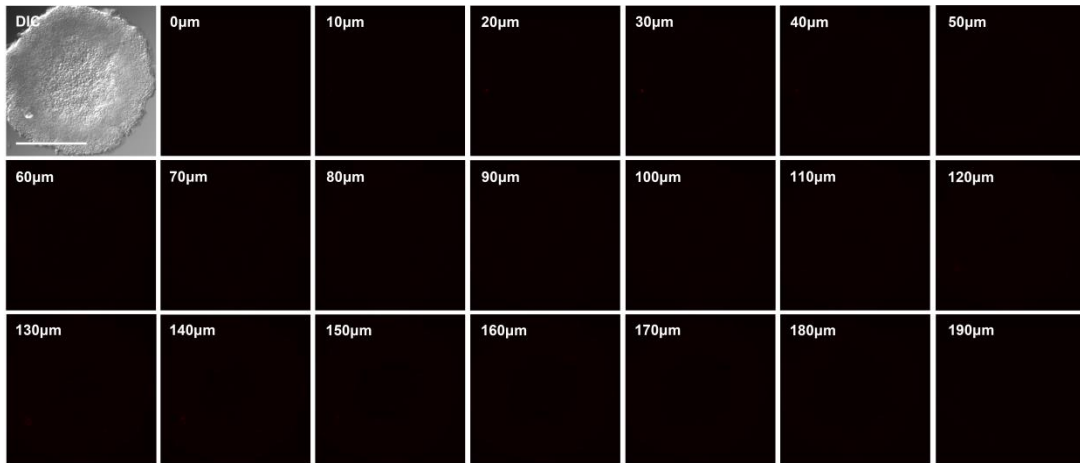

Sfigure 14: Z-Stack confocal microscopy images of A375 tumor spheroids treated by free Ce6 (800nM) for 24 hours.

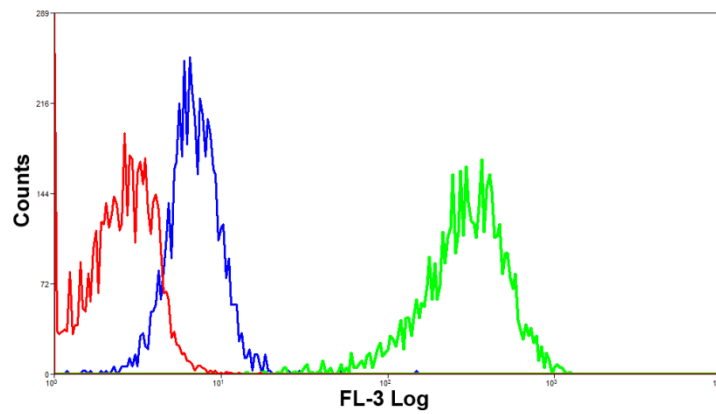

Sfigure 15: Flow cytometry detection of free Ce6 cellular uptake in A375 cells. Free Ce6 was incubated with DMEM+10% FBS (blue) and opti-MEM (green).

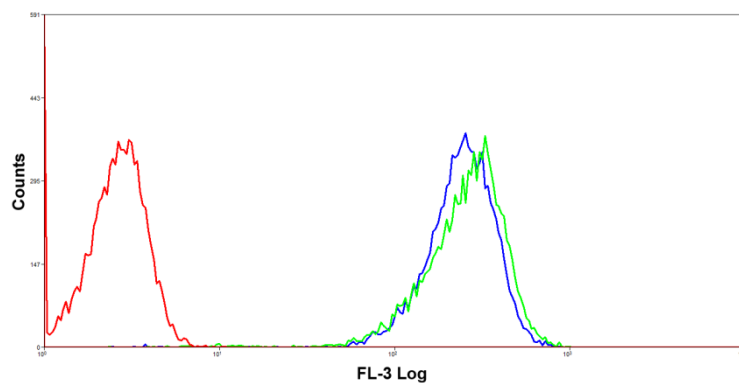

Sfigure 16: Flow cytometry detection of RGD-P-Ce6 cellular uptake in A375 cells. RGD-P-Ce6 was incubated with DMEM+10% FBS (blue) and opti-MEM (green).
